# Supplementary material
Source: Springer Nature journal article supplement (https://www.springermedizin.de/resource/supplementary/12933_2011_424_MOESM8_ESM.pdf/9538150)

Control

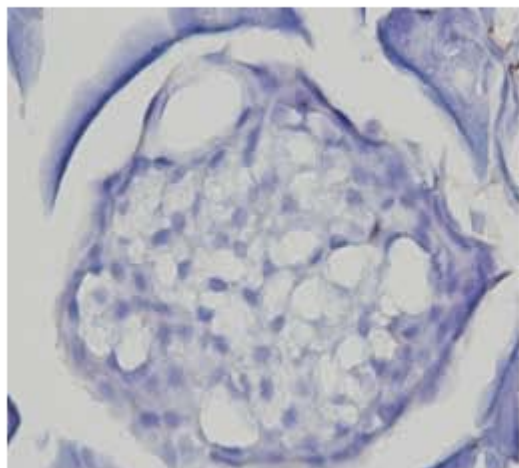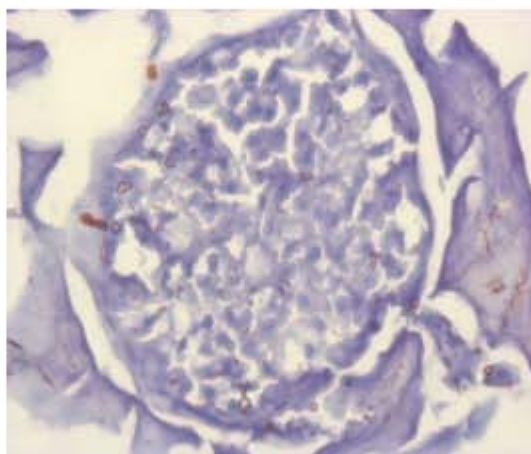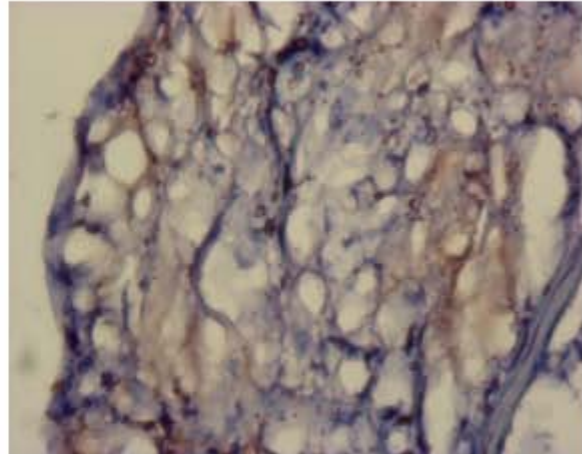

Moma2

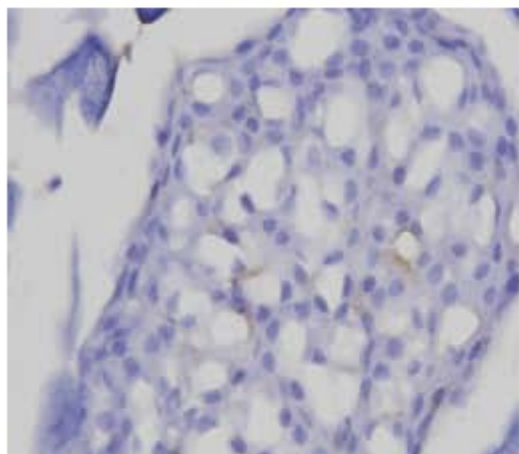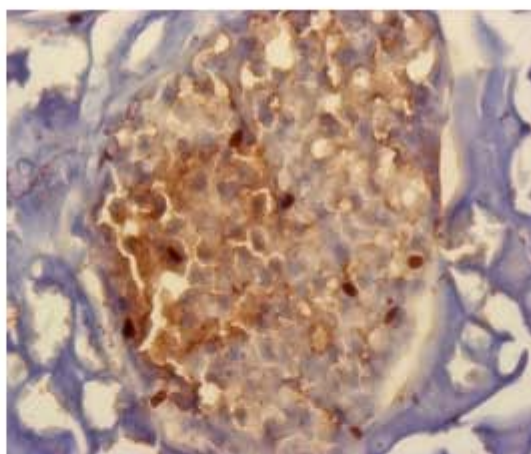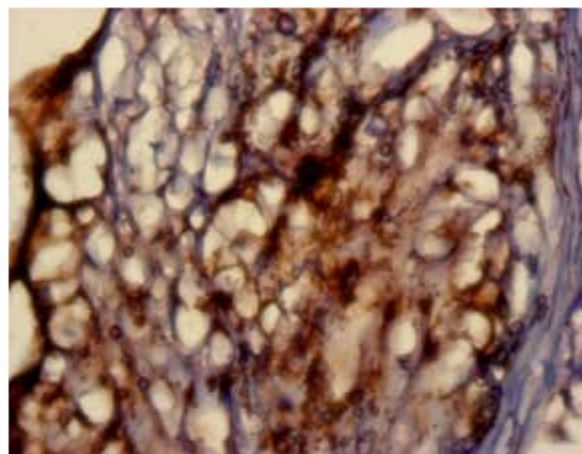

**Chow**

**Western**

**Atherosclerotic lesion**

Supplement: MOESM8 [file 9538150]
